## DNA sequence properties that predict susceptibility to epiallelic switching

Marco Catoni<sup>1,2</sup>, Jayne Griffiths<sup>1</sup>, Claude Becker<sup>3</sup>, Nicolae Radu Zabet<sup>1</sup>, Carlos Bayon<sup>1</sup>, Mélanie Dapp<sup>2</sup>, Michal Lieberman-Lazarovich<sup>2,4</sup>, Detlef Weigel<sup>3</sup> and Jerzy Paszkowski<sup>1,2,\*</sup>

### Affiliations

<sup>1</sup> The Sainsbury Laboratory, University of Cambridge, Cambridge, United Kingdom

<sup>2</sup> Department of Plant Biology, University of Geneva, Geneva, Switzerland

<sup>3</sup> Department of Molecular Biology, Max Planck Institute for Developmental Biology, Tübingen, Germany

<sup>4</sup> Present address: Evogene Ltd, 13 Gad Feinsein St., Rehovot 76121, Israel

\*Correspondence: [jerzy.paszkowski@slcu.cam.ac.uk](mailto:jerzy.paszkowski@slcu.cam.ac.uk)

### Contact Information

Marco Catoni: [marco.catoni@slcu.cam.ac.uk](mailto:marco.catoni@slcu.cam.ac.uk)

Jayne Griffiths: [jayne.griffiths@slcu.cam.ac.uk](mailto:jayne.griffiths@slcu.cam.ac.uk)

Claude Becker: [claudio.becker@tuebingen.mpg.de](mailto:claudio.becker@tuebingen.mpg.de)

Nicolae Radu Zabet: [radu.zabet@slcu.cam.ac.uk](mailto:radu.zabet@slcu.cam.ac.uk)

Carlos Bayon: [carlos.bayon@rothamsted.ac.uk](mailto:carlos.bayon@rothamsted.ac.uk)

Mélanie Dapp: [melanie.dapp@gmail.com](mailto:melanie.dapp@gmail.com)

Michal Lieberman-Lazarovich: [liebermic@gmail.com](mailto:liebermic@gmail.com)

Detlef Weigel: [weigel@tue.mpg.de](mailto:weigel@tue.mpg.de)

Jerzy Paszkowski: [jerzy.paszkowski@slcu.cam.ac.uk](mailto:jerzy.paszkowski@slcu.cam.ac.uk)

### Running title

Genetics of epigenetic switches

**Keywords:** DNA methylation, epialleles, transcriptional silencing, epigenetic

## Abstract

Transgenerationally heritable epialleles are defined by the stable propagation of alternative transcriptional states through mitotic and meiotic cell cycles. Given that the propagation of DNA methylation at CpG sites, mediated in Arabidopsis by MET1, plays a central role in epigenetic inheritance, we examined genome-wide DNA methylation in partial and complete loss-of-function *met1* mutants. We interpreted the data in relation to transgenerational epiallelic stability and provide evidence that DNA sequence features such as density of CpGs and genomic repetitiveness can be used to predict susceptibility to epiallelic switching. The importance of these rules was confirmed by analyses of common epialleles in natural Arabidopsis accessions and verified in rice.

## 1 Introduction

2 Transgenerational epigenetic inheritance have been well documented in plants, however the  
3 primary competence that leads to the formation of alternative epialleles at only certain loci is not  
4 well understood. It has been reported that maintenance of <sup>m</sup>CpG (methylated CpG) patterns by  
5 MET1 and the chromatin remodeler DDM1 is central for transgenerational epigenetic inheritance  
6 (Reinders et al. 2009; Teixeira et al. 2009). Importantly, inactivation of MET1 or DDM1 results in the  
7 loss of <sup>m</sup>CpGs, which is not easily corrected after re-introduction of MET1 and DDM1, although  
8 remethylation occurs at certain loci (Reinders et al. 2009; Teixeira et al. 2009). Thus, chromosomal  
9 targets of CpG methylation were divided into two broad categories: (a) those that can form two  
10 distinct epigenetic states (epialleles) that are maintained over generations in the presence of all  
11 epigenetic activities of the wild type, and (b) those that revert to only one dominant epigenetic state  
12 (reversible) and are thus not able to form heritable epialleles (Reinders et al. 2009; Teixeira et al.  
13 2009). Although epiallelic reversion was associated with RNA directed DNA methylation  
14 (RdDM)(Teixeira et al. 2009), the primary determinants underlying differences between the  
15 chromosomal targets of epigenetic regulation in susceptibility to epiallelic switching remained  
16 unknown. Here we compare the whole-genome distribution of DNA methylation in Arabidopsis  
17 plants carrying either a weak or strong allele of *MET1*. Although the partial loss-of-function allele  
18 *met1-1* reduces CpG methylation levels to approximately 25% of wild type (Kankel et al. 2003), this  
19 causes only minor developmental defects. In contrast, the null allele *met1-3* causes an almost  
20 complete loss of <sup>m</sup>CpGs and is semi-lethal (Mathieu et al. 2007). The methylation remaining in *met1-*  
21 *1* thus identifies a particularly important subset of <sup>m</sup>CpG sites, offering a unique opportunity to  
22 understand the function of <sup>m</sup>CpG methylation. We find that loci forming stable epialleles are  
23 similarly affected in the two mutants, while epigenetically reversible loci are affected differently in  
24 *met1-1* and *met1-3*. These observations allow inferences about the molecular mechanisms of  
25 epigenetic transgenerational inheritance at these distinct classes of loci and the formulation of

26 genetic and epigenetic rules predicting the capacity of chromosomal targets to form stable  
27 epialleles.

28

## 29 **Results and Discussion**

30 While the null allele *met1-3* causes an almost complete loss of <sup>m</sup>CpGs (Lister et al. 2008; Tariq et al.  
31 2003) and is semi-lethal (Mathieu et al. 2007), the partial loss-of-function allele *met1-1*, which  
32 reduces CpG methylation levels to approximately 25% of wild type (Kankel et al. 2003), causes only  
33 minor developmental defects. This suggests that the 25% <sup>m</sup>CpGs remaining in *met1-1* (Figure S1) are  
34 important for a large fraction of epigenetic information. Therefore, we compared whole-genome  
35 transcriptomes and methylomes between wild-type Col-0 plants, *met1-1* and *met1-3*, and also the  
36 *F2* progeny of a hybrid derived from a cross between *met1-3* and wild type. The *F2* plants were  
37 genotyped and only individuals with homozygous wild-type alleles of *MET1* were analysed. These  
38 *MET1*<sup>+</sup> *F2* (hereafter *MET1*<sup>+</sup>) siblings had inherited half of their genomes from a *met1-3* grandparent,  
39 except for the region on chromosome 5 around *MET1*. For simplicity, we excluded chromosome 5  
40 from subsequent analyses. The *MET1*<sup>+</sup> segregants had on average 57% of wild-type <sup>m</sup>CpGs that  
41 indicated remethylation of the sequences inherited from the *met1* grandparent (Figure S1C, Table  
42 S1).

43 Next, we screened for differentially methylated regions (DMRs) in pairwise comparisons with *met1-*  
44 *3*, *met1-1* and *MET1*<sup>+</sup> plants using wild type as the common denominator. DMRs in *met1-3* included  
45 almost all DMRs of both *met1-1* and *MET1*<sup>+</sup> plants (Figures 1A and S2). Interestingly, DMRs of *met1-1*  
46 and *MET1*<sup>+</sup> segregants overlapped in more than 85'000 commonly methylated cytosines,  
47 representing 57% and 48% of *met1-1* and *MET1*<sup>+</sup> DMRs, respectively (Figure 1B). There was a  
48 significant correlation (Spearman  $R^2 = 0.48$ , Pearson  $R^2 = 0.63$ ) of methylation distribution between  
49 *met1-1* and *MET1*<sup>+</sup> (Figure 1C), which was further confirmed by hierarchical clustering of <sup>m</sup>CpGs in

50 200-bp non-overlapping genomic windows (tiles) (Figure 1D). These results suggested that certain  
51 methylation patterns in *met1-1* and *MET1*<sup>+</sup> are associated with particular loci, possibly due to  
52 intrinsic characteristics of DNA sequences of the affected loci themselves. This hypothesis was tested  
53 in subsequent experiments.

54 It has been proposed that targets of DNA methylation in plants are of two distinct types (Saze and  
55 Kakutani 2011): (1) gene body methylation (hereafter referred to as Gene Body Like or GEL), present  
56 mostly in coding regions of expressed genes and consisting exclusively of <sup>m</sup>CpGs, and (2)  
57 transposable element methylation (hereafter referred to as Transposable Element Like or TEL),  
58 found predominantly at transposons and chromosomal repeats and affecting CpGs but also non-  
59 CpGs. Here, GELs were defined as gene models in which averaged methylation of cytosines in CpG  
60 context was above 5%, but less than 5% in non-CpG contexts and TELs as loci with methylation of  
61 both <sup>m</sup>CpGs and non-CpGs over 5% (Table S2). This produced totals of 11,746 GELs and 4,743 TELs.  
62 As expected, 98% of GELs were annotated as genes, while 73% of TELs were annotated as  
63 transposable elements (Figure S3) and 22% as genes (Figure S3), indicating that transposon-like  
64 methylation is also associated with a subset of protein coding genes. We also annotated this way  
65 200-bp genomic tiles containing at least 5% of averaged CpG methylation. We then examined GEL  
66 and TEL methylation in *met1-3*, *met1-1* and *MET1*<sup>+</sup>. In *met1-3*, the two types of methylation were  
67 equally erased (Figure S4). In contrast, although in *met1-1* methylation at GELs was uniformly lost,  
68 methylation losses were not uniform across TELs, with many predominantly losing and others  
69 predominantly maintaining DNA methylation (Figures 2A and S5). Interestingly, *MET1*<sup>+</sup> segregants  
70 displayed a methylation pattern very similar to *met1-1*. Analyses of GELs in the *MET1*<sup>+</sup> segregants  
71 revealed an average methylation of 50%, suggesting ubiquitous maintenance of the mid-parental  
72 methylation levels (Figures 2A, S4 and S5) and TELs in the *MET1*<sup>+</sup> segregants revealed an average  
73 methylation of 70% relative to wild type, implying substantial remethylation above the mid-parental  
74 level (Figures 2A, S4 and S5). Notably, the patterns of methylation at particular TELs in *met1-1* and  
75 *MET1*<sup>+</sup> were overlapping (Figures 2A and S5), indicating that TELs have similar remethylation

76 capacities in the two genotypes or, in the case of *met1-1*, similar resistance to methylation loss. The  
77 tiling arrays transcriptome mapping of *met1-1*, *met1-3* and wild type revealed that residual  
78 methylation in *met1-1* was also reflected by transcriptional silencing of these TELs (Figure S6).

79 Using 200-bp tiles, we further classified CpG-methylated regions according to their association with  
80 methylation of non-CpGs and performed hierarchical clustering that defined three main clusters  
81 (Figure 2B). The cluster 1 contained almost exclusively GELs, displaying the greatest methylation  
82 deficiency in *MET1*<sup>+</sup> segregants relative to other clusters, while cluster 2 and cluster 3 identified TELs  
83 with different degree of methylation in *MET1*<sup>+</sup> and *met1-1* (Figures 2B and S7). Further comparison  
84 of the global CpG methylation levels of GELs and TELs in *met1-3*, *met1-1* and *MET1*<sup>+</sup> in relation to  
85 wild type indicated that in *met1-3*, GELs and TELs both lacked <sup>m</sup>CpGs, while in *met1-1* and *MET1*<sup>+</sup>  
86 TELs had retained or regained significant levels of CpG methylation (Figure 2B and S4). These  
87 methylome and clustering analyses suggested that TELs are heterogeneous, consisting of at least  
88 two classes (Figure 2B).

89 To define genetic and epigenetic features of TELs that result in differential methylation losses in  
90 *met1-1*, correlated with methylation levels observed in *MET1*<sup>+</sup>, we sought DNA sequence properties  
91 of TELs that coincide with persistence or loss of CpG methylation in *met1-1*. We discovered that  
92 increase in the number of CpGs is associated with the propensity of TELs to lose CpG methylation  
93 (Figure 3A), suggesting a link between DNA sequence properties at methylated TELs and the  
94 formation of stably demethylated epialleles. We also found that presence of tandem repeats longer  
95 than 100 bp and increasing levels of their repetitiveness jointly correlate with maintenance of  
96 methylation in *met1-1* or thus remethylation in *MET1*<sup>+</sup> (Figure 3B). Therefore, intrinsic features of  
97 TEL DNA sequence are associated with the distribution of their methylation in *met1-1* and also with  
98 the formation of transgenerationally stable methylation patterns (epialleles) in *MET1*<sup>+</sup> segregants.

99 To further characterize the epiallelic behaviour of TELs, we rank ordered TELs of cluster 2 and 3  
100 (Figure 2B) according to their levels of methylation in *met1-1* and selected two contrasting subsets

101 of TELs for further study (Figures 3C and S8). The first subset retained less in *met1-1* than 5% of wild-  
102 type CpG methylation. As this subset resembled GELs in the capacity to form stable epialleles, we  
103 refer to them as Epiallelic-TELs or E-TELs. More than 80% of CpG methylation was retained in *met1-1*  
104 in the second subset, correlating with regain of CpG methylation in *MET1*<sup>+</sup> and, thus, rapid reversal  
105 of the levels towards wild type. This subset of TELs was named Reversible-TELs or R-TELs. It is  
106 important to bear in mind that GELs, E-TELs and R-TELs are equally depleted of CpG methylation in  
107 *met1-3* (Figure S4).

108 To directly compare methylation levels at all cytosines of E-TELs and R-TELs in wild-type, *met1-3*,  
109 *met1-1* and *MET1*<sup>+</sup> plants, we aligned their annotated sequences to construct plots for CpG, CpHpG  
110 and CpHpH methylation (Figure 3D). E-TELs displayed a complete loss of CpG methylation in both  
111 *met1* mutants and showed midparent levels of 50% of wild type in *MET1*<sup>+</sup> segregants, suggesting a  
112 lack of or minimal remethylation activity at these sequences by MET1, which is present already in  
113 *met1-3/MET1*<sup>+</sup> F1 hybrids and in *MET1*<sup>+</sup> segregants. In contrast, although R-TELs completely lost CpG  
114 methylation in *met1-3*, they reached approximately 80% of wild-type <sup>m</sup>CpGs in *MET1*<sup>+</sup> segregants  
115 (Figure 3D), supporting their active remethylation in the presence of MET1. Interestingly, although E-  
116 TELs and R-TELs do not show a relevant difference in their non-CpG methylation levels in wild-type  
117 plants (Figure S9), both CpHpG and CpHpH methylation were significantly reduced in both *met1*  
118 alleles at E-TELs but not at R-TELs (Figure 3D). Moreover, in *MET1*<sup>+</sup> plants, only E-TELs displayed a  
119 significant reduction in CpHpG methylation compared to the wild type (Figure 3D). Thus, non-CG  
120 methylation seems to persist at R-TELs in both *met1* mutant alleles but is depleted at E-TELs.

121 Methylation at CpHpGs is a part of the self-reinforcing regulatory loop with histone 3 dimethylation  
122 in lysine 9 (H3K9me2), and methylation at CpHpHs is maintained primarily by the RdDM pathway  
123 directed by small RNAs (Law and Jacobsen 2010). Using published genomic data for H3K9me2 and  
124 sRNA distribution data available for wild type and *met1-3* (Deleris et al. 2012; Lister et al. 2008), we  
125 surveyed their distributions over R-TELs and E-TELs (Figure 3E, 3F). In wild-type plants, the levels of

126 both H3K9me2 and the different classes of small RNAs were similar at R-TEs and E-TEs; however,  
127 in the *met1-3* mutant only R-TEs retained near wild-type levels of both H3K9me2 and sRNAs, while  
128 E-TEs lose both (Figures 3E, F and S10). These results are consistent with previously observed  
129 association of sRNAs and non-CpG methylation with transgenerationally “remethylable” loci  
130 (Teixeira et al. 2009).

131 Next, we examined whether E-TEs and/or R-TEs form larger epigenetically co-regulated domains or  
132 their local DNA sequences determine susceptibility to epigenetic switching. We found multiple  
133 examples of neighbourhoods of R-TEs and E-TEs (Figure S11), consistent with the hypothesis that  
134 local features of DNA sequences can be used for the prediction of epigenetic reversibility (R-TEs) or  
135 ability to form stable epialleles (E-TEs) (Figure 3A and 3B). Certain transposon superfamilies are  
136 overrepresented among E-TEs or R-TEs (Figure S12), the most striking of which are Helitrons,  
137 which have the lowest CpG content and are present exclusively in R-TEs (Figure S12). Moreover,  
138 although most TE superfamilies were represented in E-TEs and R-TEs, certain TE families were  
139 enriched differentially among E-TEs and R-TEs (Tables S3, S4 and Figure S13A), indicating that in  
140 addition to the sequence characteristics of a particular family, further sequence features, as  
141 delineated here, may explain the epigenetic properties of TEs. Certain transposon families could be  
142 clearly separated, consistent with E-TEL or R-TEL characteristics (Figure S13B), thus further  
143 reinforcing the hypothesis that DNA sequence composition, in combination with repetitiveness, can  
144 be used in defining likelihood of epiallelic properties of loci. Interestingly, one TE family (ATENSPM5)  
145 was represented in both E-TEs and R-TEs (Figure S13A). This unusual feature of ATENSPM5  
146 appeared to exhibit a surprising duality of epigenetic regulation within this transposons by which  
147 one open reading frame (ORF) behaves like an E-TEL and the other as an R-TEL (Figure S14), again  
148 supporting the importance of very local DNA sequence determinants in differential epigenetic  
149 regulation.



150 To directly determine transgenerational epigenetic properties of GELs, E-TEs and R-TEs, and  
151 especially the remethylation timing of R-TEs, we backcrossed *met1-3*, which is in the Col-0  
152 accession, to the wild-type Landsberg *erecta* (Ler) accession. This allowed the use of DNA sequence  
153 polymorphism to discriminate between alleles of the two parents in F1 hybrids and, thus, to  
154 separately examine their methylation levels. Parental methylation levels of GELs and E-TEs were  
155 maintained in F1 plants, displaying clear epi-heterozygosity (Figure 4A). In contrast, *met1-3*-derived  
156 R-TEs underwent efficient remethylation, suggesting that *de-novo* DNA methylation occurred as  
157 soon as functional MET1 became available (Figure 4B). Therefore R-TEs are clearly different  
158 from “remethylable” loci where remethylation does not occur in the F1 (Teixeira et al. 2009). In  
159 addition, we examined in reciprocal backcrosses expression at R-TEs and E-TEs. The expression of  
160 E-TEs observed in *met1-1* was maintained in F1 plants, R-TEL expression was efficiently silenced to  
161 the initial wild-type level, independent of the crossing direction (Figure 4C, D). This was true for loci  
162 annotated as transposons as well as for protein-coding genes with R-TEs or E-TEs in their  
163 promoters (Figure 4C, D).

164 Importantly, a backcross of *met1-1* to wild type brings hypomethylated and wild-type epialleles  
165 together in the F1, which opens the possibility of *trans* interactions between epialleles (Greaves et  
166 al. 2012; Rigal et al. 2016). To avoid for the first time such confounding epiallelic trans-interactions,  
167 we introduced a *MET1* transgene into *met1-1* plants and examined R-TEs and E-TEs in two  
168 complemented transgenic lines with wild type-like MET1 protein levels (Figure S15 and S16). Similar  
169 to what was observed in *met1/MET1* F1 hybrids and in *MET1*<sup>+</sup> plants, R-TEs and E-TEs displayed  
170 their previously documented transcriptional attributes in both complemented transgenic lines  
171 (Figure 4E). Finally, we examined genome wide DNA methylation profiles of the two *MET1*  
172 complemented lines (Table S1 and Figure S1) and observed that transgenic MET1-dependent DNA  
173 remethylation occurs exclusively at R-TEs, and not at E-TEs or GELs (Figure 4F and S16A, B).  
174 Likewise, epigenetic properties of certain TEs recorded in *MET1*<sup>+</sup> plants (Figure S14) are consistent  
175 with those observed in the transgenic lines (Figure S16C). Taken together, these results confirmed

176 that distinct DNA sequence properties rather than trans-epiallelic interactions determine DNA  
177 epigenetic stability or switching.

178 Finally, we wanted to know whether our predictive rules of DNA sequence properties in defining  
179 susceptibility to epigenetic switching have broader applicability. For that, we identified GELs, E-TELS  
180 and R-TELS in data from published experiments. For example, it has been demonstrated that  
181 progeny of heterozygous *met1-3* plants experience CpG methylation loss in the absence of MET1  
182 during post-meiotic divisions of the haploid gametophytes (Saze et al. 2003). Therefore, it can be  
183 predicted that inbreeding of *met1-3* heterozygous plants will result in gradual methylation losses.  
184 However, since MET1 would be present at each generation during somatic development, R-TELS  
185 would be subjected to remethylation, while GELs and E-TELS would remain hypomethylated. To test  
186 this prediction, we scored methylation levels of GELs, E-TELS and R-TELS in previously reported  
187 methylation profiles of plants propagated as heterozygous *met1-3* (*met1-3 +/-*) and wild-type plants  
188 (*met1-3 +/+*) segregating from these lines (Stroud et al. 2013). Consistent with our predictions,  
189 complete loss of CpG methylation at GELs and strong reduction in E-TELS were found in these  
190 datasets. In contrast, levels of methylation at R-TELS were similar to wild type (Figure 5A).

191 Next, we tested distribution of DMRs in R-TELS, GELs and E-TELS in the results of inbreeding  
192 experiments of Arabidopsis for 30 generations (Becker et al. 2011) and in natural Arabidopsis  
193 accessions (Schmitz et al. 2013). In both populations, we registered the occurrence of DMRs at GELs  
194 and E-TELS at a high frequency and at R-TELS at a very low frequency (Figure 5B). Thus, the revealed  
195 DNA sequence properties can be used to predict transgenerational epigenetic inheritance in nature.

196 To test whether these DNA sequence rules are universal and thus applicable to other plant species,  
197 we turned to methylation data from recently characterized *met1* mutants of rice (Hu et al. 2014). In  
198 this mutant, CpG methylation is reduced by 76%, closely resembling levels in Arabidopsis *met1-1*  
199 (Figure S17A and Table S1). CpG methylation at rice GELs was lost efficiently and TELs were  
200 characterized by heterogeneous methylation losses (Figure 6A), which mirrored Arabidopsis results

201 (Figure 2A, S4). We then compared the DNA sequences of Arabidopsis and rice E-TEs and R-TEs  
202 (Figure 3C, S8). Since Arabidopsis and rice genomes have different sizes, CG contents and number of  
203 repeats, we normalized their sequences according to the general properties of each genome. The  
204 characteristics of DNA sequences (specific CpG frequencies) of rice E-TEs and R-TEs and degrees of  
205 sequence repetitiveness were found to be similar to those of Arabidopsis (Figure 6B and C and S17B  
206 and C).

207 It has often been discussed whether and, if so, to what extent DNA sequence itself impacts on  
208 epigenetic regulation (Schübeler 2015). Recent transgenic experiments, with site-directed insertion  
209 of various DNA fragments into a predefined chromosomal position of mammalian cells, provided  
210 evidence that the base composition of DNA sequence may attract or prevent DNA methylation  
211 according to CpG content and the occurrence of transcription factor binding sites (Krebs et al. 2014).  
212 However, molecular determinants that distinguish between chromosomal loci that rapidly revert to  
213 one dominant epigenetic state and loci that form alternative transgenerationally heritable epiallelic  
214 states (epialleles) remained largely unknown. Our results demonstrate that the properties of DNA  
215 sequence can be used to predict the epiallelic behaviour of certain classes of plant chromosomal  
216 loci. Repetitiveness and relative scarcity of CpGs are associated with rapid reversion to one  
217 dominant epigenetic state and low copy number and high CpG content are linked to the formation  
218 and support of the transgenerational stability of alternative epiallelic states.

## 219 **Methods**

### 220 **Plant growth and material.**

221 Plants used in this work were derived from *Arabidopsis thaliana* Columbia-0 lines, 13<sup>th</sup> and 2<sup>nd</sup>  
222 generation homozygous *met1-1* (Kankel et al. 2003) and *met1-3* (Saze et al. 2003) have been used,  
223 respectively. The *met2,3,4* triple mutant was generated by crossing the lines SALK\_010893,  
224 SALK\_099592 and SALK\_098878, genotyping and selecting the segregating homozygous mutants

225 through PCR. Seeds were stratified at 4°C for 4 days and plants grown in ½ MS 1.5% agar vertical  
226 plates or in soil, depending on the analysis. Plants were grown under long-day conditions (21°C, 16 h  
227 light, 8 h dark).

## 228 **Genomic data**

229 Histone methylation data and small RNA data for Col-0 and *met1-3* were GSE370775 and GSE10967,  
230 respectively (Deleris et al. 2012; Lister et al. 2008). DMRs recovered in the long-term inbreeding  
231 experiments and DMRs found in Arabidopsis accessions were retrieved from previously published  
232 work (Schmitz et al. 2013; Becker et al. 2011).

## 233 **Nucleic Acid Extraction**

234 DNA and RNA were extracted from pools of 2-week-old seedlings (25-30 plants per pool) grown on  
235 plates of wild type, *met1-1* and *met1-3*. Due to epiallelic segregation in *MET1*<sup>+</sup> plants, two *MET1*<sup>+</sup>  
236 pools (8 plants each) were generated starting from genotyped *MET1* wild-type leaves derived from  
237 the segregating progeny of two F1 plants, obtained by backcrossing *met1-3* with Col-0. For each  
238 genotype, genomic DNA was extracted using the Qiagen Plant DNeasy kit (Qiagen), starting from  
239 nuclei purified as described in (Becker et al. 2011). Total RNA was extracted using the Trizol  
240 (Invitrogen) method according to the manufacturer's instructions.

## 241 **Library Preparation**

242 Bisulfite-converted DNA libraries of *met1-1*, *met1-3*, two *MET1*<sup>+</sup> replicates, two transgenic  
243 complemented lines (T-MET1a and T-MET1b) and wild type Col-0 control for genomic sequencing  
244 were performed starting from 0.5 - 1 µg of genomic DNA using the NEBNext DNA Sample  
245 PrepReagentSet1 (New England Biolabs), following the Illumina Genomic Sample Prep Guide  
246 (Illumina), as described in (Becker et al. 2011). Libraries for RNA expression analysis were prepared  
247 in triplicate from 3 µg of total RNA, processed with the GeneChip Whole Transcript Amplified

248 Double-Stranded Target Assay (Affymetrix), according to the manufacturer's protocol, to generate  
249 labelled cDNA for tiling microarray hybridization.

## 250 **Analysis of Gene Expression**

251 The labelled cDNA was hybridised to the GeneChip Arabidopsis Tiling 1.0R array (Affymetrix) and  
252 scanned following the manufacturer's instructions. Tiling array hybridisation data were processed  
253 with the R statistical software (r-project.org) and BioConductor (www.bioconductor.org) applying  
254 the chip definition file (CDF), kindly provided by Naouar et al (2009), as previously described  
255 (Yokthongwattana et al. 2010).

256 For real-time qRT-PCR analysis, total RNA (2 µg) was treated with RQ1 DNase (Promega) and reverse  
257 transcribed with the SuperScript VILO cDNA Synthesis Kit (Invitrogen) according to the  
258 manufacturer's instructions. PCR reactions were carried out in triplicate using 10 ng of template  
259 cDNA, 200 nM target specific primers (Table S5), and LightCycler 480 SYBR Green I Master (Roche) in  
260 the LightCycler 480 II detection system (Roche) in a volume of 10 µl.

## 261 **Sequencing and processing**

262 Bisulfite-converted libraries were sequenced with 2 x 101-bp paired-end reads on an Illumina GAIIx  
263 or Illumina NextSeq 500 instrument. For image analysis and base calling, we used the Illumina OLB  
264 software version 1.8. The raw reads were trimmed using Trimmomatic (Bolger et al. 2014) in order  
265 to remove adapter sequences. Reads with an average quality value of at least 15 in a window of 4  
266 nucleotides were trimmed from both ends. After trimming, reads shorter than 16 bases were  
267 discarded. The remaining sequences (on average 77% of raw reads) were aligned against the  
268 *Arabidopsis thaliana* genome TAIR10 version using Bismark (Krueger and Andrews 2011). Duplicated  
269 reads were collapsed into one read. Chloroplast sequences were used to estimate the bisulfite  
270 conversion (on average above 99%) (Table S1). To account for non-converted DNA, we applied a  
271 correction according to (Lister et al. 2013). The number of methylated reads were decreased as:  $m^* =$   
272  $\max(0, m - nc)$  (where  $m^*$  is the corrected number of methylated reads,  $m$  is the raw number of

273 methylated reads,  $n$  is the total number of reads and  $c$  is the conversion rate). DMRs (differentially  
274 methylated regions) were defined comparing methylation in wild type Col-0 with the other  
275 conditions analysed using the R package “DMRcaller” (Zabet and Tsang 2015). We used “noise filter”  
276 method to compute CpG and CpHpG DMRs. Briefly, the “noise filter” method uses a triangular kernel  
277 to smooth the total number of reads and the total number of methylated reads. Note that the “noise  
278 filter” method uses the assumptions of BSmooth package (Hansen et al. 2012), namely, that  
279 adjacent cytosines display correlated methylation. In particular, we used a window size of 172 nt,  
280 for CpG methylation, and 160 nt, for CpHpG methylation, to smooth the data and then we  
281 performed a Score test at each position to determine the positions that display a statistically  
282 significant differences in methylation levels between the two conditions (note that using the Score  
283 test leads to the same results as Fisher’s exact test, but was much faster to compute). At each  
284 position we computed the p-value and adjusted for multiple testing using the Benjamini and  
285 Hochberg’s method (Benjamini and Hochberg 1995) to control the false discovery and we discarded  
286 positions with FDR higher than 0.05. We further discarded the positions with less than 4 reads and  
287 the positions with differences in methylation levels lower than 0.4, in the case of CpG, and 0.2 in the  
288 case of CpHpG. Adjacent positions within 200 nt of each other were joined only if the resulting DMR  
289 displayed an minimal average number of reads per cytosine of 4 and statistically significant  
290 difference in methylation level (FDR lower than 0.05) which is at least 0.4 in the case of CpG and 0.2  
291 in the case of CpHpG. For CpHpH DMRs, we used the “neighbouring” method, which performs the  
292 same algorithm as the “noise filter” method except that it does not perform data smoothing. In the  
293 case of CpHpHp DMRs, we considered only regions that display a minimal difference in the  
294 methylation level of 0.1 and a minimum size of 50 bp. Rice *met1* mutant and wild type control  
295 sequencing data were obtained from (Hu et al. 2014) and re-analysed with the parameters described  
296 for Arabidopsis.

## 297 **Sequence Methylation Analysis**

298 Annotated DNA sequences or genomic 200-bp tiles (with 150 bp overlap) were classified according  
299 to the methylation information available in wild type Col-0 for Arabidopsis (provided in this work)  
300 and Nipponbare for rice (Hu et al. 2014). Methylation values were averaged among all cytosines in  
301 the same context in each TAIR10 annotated sequence or 200 bp tile, with a minimum coverage of  
302 five reads. A sequence was considered GEL if more than 5% methylation was present in CpG context,  
303 and less than 5% of methylation was present in each of the non-CpG contexts (CpHpG and CpHpH).  
304 Sequences were considered TEL if more than 5% of methylation was present in each cytosine  
305 context. Sequences were considered not methylated if less than 5% of methylation was present in  
306 each context (Table S2). Fisher exact test or Wilcoxon test were used according to the data  
307 distribution. Shapiro and Bartlett tests were used for normal distribution or variance similarity,  
308 respectively.

## 309 **Local DNA Methylation Analysis**

310 Approximately 1 µg of DNA extracted using a Mini plant DNA kit (Qiagen) was used for bisulfite  
311 conversion with the EpiTect Bisulfite kit (Qiagen) according to the manufacturer's instructions. One  
312 microliter of converted DNA was PCR-amplified with degenerate primers designed to match the  
313 tested target. The PCR products were cloned into pGEM-T Easy (Promega) and independent clones  
314 were sequenced for each condition analysed. KISMETH (Gruntman et al. 2008), a plant-specific tool  
315 for bisulfite sequencing analysis, was used to calculate the percentage of methylation and average  
316 different clones. We estimated a bisulfite conversion rate of 98%, based on the methylation level at  
317 the non-methylated *PHAVOLUTA* (At1g30490) locus (Bao et al. 2004).

## 318 **MET1 Antibody Production**

319 The BAH\_DMC domain of MET1 of 175 amino acids (695aa–869aa) was cloned into pDEST-15-GST  
320 (Glutathione S-Transferase tagged; Gateway, Invitrogen) using the primers met1\_BAH1\_attB1 and  
321 met1\_BAH1\_attB2 (Table S5); the transformed BL21 *E.coli* strain as used to produce the

322 recombinant protein. Purified GST::BAH protein was injected into two rabbits (AGRO-BIO, La Ferté  
323 Saint Aubin, France). Although both rabbit sera produced non-specific signals with Arabidopsis  
324 protein extract, one serum (anti-MET-84/J77) yielded the signal expected for MET1 protein in wild  
325 type (172.4 kDa).

### 326 **Transgenic *met1-1* Complementation**

327 The genomic version of *MET1* and the 2,677-bp upstream promoter sequence were independently  
328 amplified from genomic DNA using the primer combinations met1\_adapF/met1\_FLAGR, and  
329 Met1PR\_adap\_F/Met1PR\_adap\_R, respectively (Table S5). The *MET1* gene was assembled into a  
330 *pGPTVII-bar-MCS* (multi-cloning-site) plasmid using the XhoI/XmaI sites and cloned into the  
331 barII\_pUBQ10\_MCS binary vector. The ubiquitin promoter was then removed and substituted with  
332 the *MET1* promoter using the HindIII/XhoI sites. The *Agrobacterium tumefaciens* pGV3101 strain was  
333 used to transform *A. thaliana met1-1* using the standard floral-dip method. Transgenic lines were  
334 selected *in vivo* for resistance to BASTA (dl-phosphinothricin, Duchefa). Two T2 lines homozygous for  
335 transgenic *MET1* gene (T-MET1a and T-MET1b) were used for preparing bisulfite-converted DNA  
336 libraries and sequenced as described for the other genotypes.

### 337 **Protein Extraction and Analysis**

338 Arabidopsis 15-day-old seedlings grown on plates were used for protein analysis. Around 10  
339 seedlings were pooled in 2-ml tubes and frozen in liquid nitrogen. The samples were homogenized in  
340 the TissueLyser II (Qiagen) and proteins extracted with 200 µl of 2X Laemmli Sample Buffer (Sigma).  
341 Samples were incubated for 3 min at 95°C and centrifuged; aliquots of 15 µl were loaded onto Mini-  
342 PROTEAN precast polyacrylamide gels (Biorad) for electrophoresis and SDS-PAGE separation. The  
343 separated proteins were transferred to PVDF membrane and immunodetection performed using  
344 1:2500 primary antibody (anti-MET-84/J77) dilution follow by 1:25000 dilution of anti-rabbit-HRP  
345 (Sigma). Signal intensities were measured with Odyssey Fc (Li-COR Biosciences).



## 346 References

- 347 Bao N, Lye K-W, Barton MK. 2004. MicroRNA Binding Sites in Arabidopsis Class III HD-ZIP mRNAs Are  
348 Required for Methylation of the Template Chromosome. *Dev Cell* **7**: 653–662.
- 349 Becker C, Hagmann J, Müller J, Koenig D, Stegle O, Borgwardt K, Weigel D. 2011. Spontaneous  
350 epigenetic variation in the Arabidopsis thaliana methylome. *Nature* **480**: 245–249.
- 351 Benjamini Y, Hochberg Y. 1995. Controlling the False Discovery Rate: A Practical and Powerful  
352 Approach to Multiple Testing. *J R Stat Soc Ser B Methodol* **57**: 289–300.
- 353 Bolger AM, Lohse M, Usadel B. 2014. Trimmomatic: A flexible trimmer for Illumina Sequence Data.  
354 *Bioinformatics* btu170.
- 355 Deleris A, Stroud H, Bernatavichute Y, Johnson E, Klein G, Schubert D, Jacobsen SE. 2012. Loss of the  
356 DNA Methyltransferase MET1 Induces H3K9 Hypermethylation at PcG Target Genes and  
357 Redistribution of H3K27 Trimethylation to Transposons in Arabidopsis thaliana. *PLoS Genet*  
358 **8**: e1003062.
- 359 Gel B, Díez-Villanueva A, Serra E, Buschbeck M, Peinado MA, Malinverni R. 2016. regioneR: an  
360 R/Bioconductor package for the association analysis of genomic regions based on  
361 permutation tests. *Bioinformatics* **32**: 289–291.
- 362 Greaves IK, Groszmann M, Ying H, Taylor JM, Peacock WJ, Dennis ES. 2012. Trans Chromosomal  
363 Methylation in Arabidopsis hybrids. *Proc Natl Acad Sci* **109**: 3570–3575.
- 364 Gruntman E, Qi Y, Slotkin RK, Roeder T, Martienssen RA, Sachidanandam R. 2008. Kismeth: Analyzer  
365 of plant methylation states through bisulfite sequencing. *BMC Bioinformatics* **9**: 371.
- 366 Hansen KD, Langmead B, Irizarry RA. 2012. BSmooth: from whole genome bisulfite sequencing reads  
367 to differentially methylated regions. *Genome Biol* **13**: R83.
- 368 Hu L, Li N, Xu C, Zhong S, Lin X, Yang J, Zhou T, Yuliang A, Wu Y, Chen Y-R, et al. 2014. Mutation of a  
369 major CG methylase in rice causes genome-wide hypomethylation, dysregulated genome  
370 expression, and seedling lethality. *Proc Natl Acad Sci* **111**: 10642–10647.
- 371 Kankel MW, Ramsey DE, Stokes TL, Flowers SK, Haag JR, Jeddloh JA, Riddle NC, Verbsky ML,  
372 Richards EJ. 2003. Arabidopsis MET1 Cytosine Methyltransferase Mutants. *Genetics* **163**:  
373 1109–1122.
- 374 Krebs AR, Dessus-Babus S, Burger L, Schübeler D. 2014. High-throughput engineering of a  
375 mammalian genome reveals building principles of methylation states at CG rich regions.  
376 *eLife* **3**: e04094.
- 377 Krueger F, Andrews SR. 2011. Bismark: a flexible aligner and methylation caller for Bisulfite-Seq  
378 applications. *Bioinformatics* **27**: 1571–1572.
- 379 Law JA, Jacobsen SE. 2010. Establishing, maintaining and modifying DNA methylation patterns in  
380 plants and animals. *Nat Rev Genet* **11**: 204–220.
- 381 Lister R, Mukamel EA, Nery JR, Urich M, Puddifoot CA, Johnson ND, Lucero J, Huang Y, Dwork AJ,  
382 Schultz MD, et al. 2013. Global Epigenomic Reconfiguration During Mammalian Brain  
383 Development. *Science* **341**: 1237905.

- 384 Lister R, O'Malley RC, Tonti-Filippini J, Gregory BD, Berry CC, Millar AH, Ecker JR. 2008. Highly  
385 Integrated Single-Base Resolution Maps of the Epigenome in Arabidopsis. *Cell* **133**: 523–536.
- 386 Mathieu O, Reinders J, Čaikovski M, Smathajitt C, Paszkowski J. 2007. Transgenerational Stability of  
387 the Arabidopsis Epigenome Is Coordinated by CG Methylation. *Cell* **130**: 851–862.
- 388 Reinders J, Wulff BBH, Mirouze M, Marí-Ordóñez A, Dapp M, Rozhon W, Bucher E, Theiler G,  
389 Paszkowski J. 2009. Compromised stability of DNA methylation and transposon  
390 immobilization in mosaic Arabidopsis epigenomes. *Genes Dev* **23**: 939–950.
- 391 Rigal M, Becker C, Pélissier T, Pogorelcnik R, Devos J, Ikeda Y, Weigel D, Mathieu O. 2016. Epigenome  
392 confrontation triggers immediate reprogramming of DNA methylation and transposon  
393 silencing in Arabidopsis thaliana F1 epihybrids. *Proc Natl Acad Sci* 201600672.
- 394 Saze H, Kakutani T. 2011. Differentiation of epigenetic modifications between transposons and  
395 genes. *Curr Opin Plant Biol* **14**: 81–87.
- 396 Saze H, Scheid OM, Paszkowski J. 2003. Maintenance of CpG methylation is essential for epigenetic  
397 inheritance during plant gametogenesis. *Nat Genet* **34**: 65–69.
- 398 Schmitz RJ, Schultz MD, Urich MA, Nery JR, Pelizzola M, Libiger O, Alix A, McCosh RB, Chen H, Schork  
399 NJ, et al. 2013. Patterns of population epigenomic diversity. *Nature* **495**: 193–198.
- 400 Schübeler D. 2015. Function and information content of DNA methylation. *Nature* **517**: 321–326.
- 401 Stroud H, Greenberg MVC, Feng S, Bernatavichute YV, Jacobsen SE. 2013. Comprehensive Analysis of  
402 Silencing Mutants Reveals Complex Regulation of the Arabidopsis Methylome. *Cell* **152**: 352–  
403 364.
- 404 Tariq M, Saze H, Probst AV, Lichota J, Habu Y, Paszkowski J. 2003. Erasure of CpG methylation in  
405 Arabidopsis alters patterns of histone H3 methylation in heterochromatin. *Proc Natl Acad  
406 Sci U S A* **100**: 8823–8827.
- 407 Teixeira FK, Heredia F, Sarazin A, Roudier F, Boccara M, Ciaudo C, Cruaud C, Poulain J, Berdasco M,  
408 Fraga MF, et al. 2009. A Role for RNAi in the Selective Correction of DNA Methylation  
409 Defects. *Science* **323**: 1600–1604.
- 410 Yokthongwattana C, Bucher E, Čaikovski M, Vaillant I, Nicolet J, Scheid OM, Paszkowski J. 2010.  
411 MOM1 and Pol-IV/V interactions regulate the intensity and specificity of transcriptional gene  
412 silencing. *EMBO J* **29**: 340–351.
- 413 Zabet N, Tsang J. 2015. DMRcaller: Differentially Methylated Regions caller.

414

## 415 **Acknowledgements**

416 This work was supported by EVOBREED ERC grant 322621, Gatsby Fellowship AT3273/GLE, AENEAS  
417 and Max Planck Society.

418 **Author Contributions**

419 Conception and design of the experiments: MC and JP. Nucleic acid library preparations: MC, MD,  
420 MLL, C Becker and C Bayon. Genome-wide sequencing: C Becker. Local DNA methylation profiles: JG  
421 and MC. Performance of all other experiments: MC. Analysis of the data: MC, NRZ and C Becker.  
422 Contribution of reagents/materials/analysis tools: JP and DW. Writen the paper: MC and JP.

423

## 424 **Figure Legends**

### 425 **Figure 1. Patterns of CpG methylation in *met1-1* and *MET1*<sup>+</sup> plants.**

426 (A) Venn diagrams of genome-wide hypomethylated CpG DMRs (chromosomes 1 to 4) of *met1-3*  
427 compared to control Col-0 plants and later compared to DMRs of *met1-1* and *MET1*<sup>+</sup>. For *met1* and  
428 *MET1*<sup>+</sup> plants, DMRs were considered with a relative difference to wild type of  $\geq 80\%$  and  $\geq 40\%$ ,  
429 respectively. Overlapping areas represent number of cytosines in shared portions of DMRs.

430 (B) Venn diagram of genome-wide hypomethylated CpG DMRs (chromosomes 1 to 4) of *met1-1* ( $\geq$   
431 80% difference) and combined (union of DMRs) *MET1*<sup>+</sup> plant pools ( $\geq 40\%$  difference). Permutation  
432 test with 1000 iterations using *regioner* package (Gel et al. 2016) confirmed a statistically significant  
433 overlap (p-value = 0.001).

434 (C) Scatter plot of CpG DMRs (chromosomes 1 to 4) of *met1-1* and union of DMRs *MET1*<sup>+</sup> plants  
435 (DMR criteria as in A and B). Linear regression - red line. The correlation coefficient is indicated in  
436 the bottom right corner of the plot.

437 (D) Hierarchical clustering of CpG methylation in genomic tiles of wild type (wt), *met1-1*, *met1-3* and  
438 *MET1*<sup>+</sup> plants (chromosomes 1 to 4). The methylation of *MET1*<sup>+</sup> was adjusted by subtracting 50% of  
439 the methylation derived from wild type. Clustering based on randomly selected genomic tiles (10%)  
440 ( $n = 13,668$ ) representing  $\geq 50\%$  CpG methylated in wild type were used for analyses.

441

### 442 **Figure 2. Distribution of CpG methylation at GELs and TELs in wild type, *met1-1*, *met1-3* and *MET1*<sup>+</sup>**

443 (A) Distribution of CpG methylation levels at 200-bp tiles ( $\geq 80\%$  CpG methylated in wild type) along  
444 chromosome 3 at GELs or TELs (Table S2). Lines were generated using lowest smooth R with a span  
445 of 1/50. Legend to colours assigned to particular genotypes is above the right graph. *MET1*<sup>+</sup> showed  
446 is mean value of two replicates. Corresponding graphs for chromosomes, 2, and 4 are in Figure S5.

447 (B) Heatmap R of DNA methylation levels at 200-bp tiles (10% randomly selected of chromosome 1,  
448 CpG methylated in wild type  $\geq 40\%$ ,  $n=11,094$ ). Sequence context of methylation, genotypes and  
449 methylation levels are indicated above the figure. Tiles were ordered according to hierarchical  
450 clustering (hclust, R software environment) and the main clusters are delineated by horizontal lines  
451 and explained at the right of the figure and in the main text. The Euclidean distance dendrogram is  
452 presented left of the figure. *MET1*<sup>+</sup> sample is derived from the second replicate.

453

### 454 **Figure 3. Genetic and epigenetic properties of TELs.**

455 (A) Box plot of CpG methylation levels in *met1-1* relative to wild type (wt) in 200-bp tiles assigned to  
456 TELs (Table S2) and sorted according to the number of CpGs. The genome-wide tile distribution is  
457 illustrated by a grey box plot at the top of the chart.

458 (B) Box plot of CpG methylation levels in *met1-1* relative to wild type (wt) in tandem repeats sorted  
459 according to the size of the repeat units (left) or their copy number (right).

460 (C) Density plot of CpG methylation level distribution in *met1-1* relative to wild type for 200-bp tiles  
461 assigned to sub-cluster 2 and cluster 3 as defined in Figure 1B. Vertical dashed lines mark criteria for  
462 E-TELS and R-TELS selection which incorporate mostly tiles from cluster 2 and cluster 3, respectively.

463 (D) Kernel density plots of DNA methylation levels in wild type, *met1-1*, *met1-3* and *MET1*<sup>+</sup> plants at  
464 R-TELS and E-TELS. Identities of R-TEL and E-TEL (defined in C) are according to TAIR10 annotation  
465 and aligned at the 5' end or the 3' ends (vertical lines). Average methylation levels for each 200-bp  
466 window are plotted. R-TELS and E-TELS at chromosome 5 were excluded from the analyses. Black  
467 dashed line displays WT and *met1-3* mid-parental methylation.

468 (E) Box plot of H3K9me2 levels at R-TELS and E-TELS in wild type and *met1-3* (Deleris et al. 2012).  
469 Analyses were performed with 200-bp windows.

470 (F) Box plot of small RNA levels at R-TELS and E-TELS in wild type and *met1-3* (Lister et al. 2008).  
471 Analyses were performed with 200-bp windows.

472

473 **Figure 4. Transgenerational epiallelic stability of GELs, E-TELS and R-TELS in backcrosses.**

474 (A) DNA methylation analyses at two GELs (ATG4G00450 and AT4G11970) and two E-TELS  
475 (AT1G47660 and AT4G25530- *FWA* promoter) of parental strains (*met1-3* mutant, which is in the  
476 Col-0 accession and Landsberg erecta (Ler) accession (panels marked P) and F1 hybrid (panels  
477 marked F1) containing *met1-3* and Ler derived chromosomes, that can be distinguished by DNA  
478 polymorphism. Open circles represent unmethylated cytosine and closed circles methylated. The  
479 colours correspond to methylation in different sequence contexts explained in (B).

480 (B) DNA methylation analyses at two R-TELS (AT3TE46565-Copia28 and AT2G17690-*SDC* promoter).  
481 General marking as in (A)

482 (C) Transcript levels in *met1-1* and in reciprocal F1 hybrids of *met1-1* and wild type (colour code  
483 above the graphs) of transposons assigned to R-TEL or E-TEL. The values are log ratio relative to the  
484 wild type adjusted to 0 (baseline). Graphs represent mean values of three biological repetitions, ±  
485 s.d. marked by black lines.

486 (D) Transcript levels in *met1-1* and in reciprocal F1 hybrids of *met1-1* and wild type of genes assigned  
487 to R-TEL or E-TEL.

488 (E) Transcript levels in *met1-1* and in two independent transgenic lines with a reintroduced copy of  
489 the *MET1* gene (T-MET1a and T-MET1b). Colour code is given next the graphs. The identities of the  
490 tested loci are provided below the graph. General marking as in (C).

491 (F) Kernel density plots of CpG methylation levels in wild type (WT), *met1-1*, and complemented  
492 *met1-1* lines (T-MET1a and T-MET1b) at R-TELS and E-TELS applied to TAIR10 annotation and aligned  
493 at the 5' end or the 3' ends (vertical lines). Average methylation levels for each 200-bp window are  
494 plotted. Chromosome 5 was excluded from the analyses. Corresponding plot for GELs is displayed on  
495 Figure S16.

496 **Figure 5. Epiallelic frequencies in Arabidopsis**

497 (A) Box plot of CpG methylation levels in 200-bp genomic tiles sorted as R-TELS, E-TELS and GELs in  
498 wild type, inbred *met1-3* heterozygous mutant (*met1-3 +/-*) and wild type plants segregated from  
499 inbred *met1-3* heterozygous mutant (*met1-3 +/+*) (Stroud et al. 2013). Only GEL tiles with on average  
500 CpG methylation  $\geq 80\%$  were considered for this analysis.

501 (B) Relative distribution of CpG DMRs (among sequences with  $\geq 60\%$  CpG methylation in wild type),  
502 found in *met1-3* in long time inbreeding (Becker et al. 2011) and among Arabidopsis accessions  
503 (Schmitz et al. 2013), divided to R-TELS or GELs/E-TELS. Total number of considered DMRs (*n*) for  
504 each experimental system is given above the graphs.

505

506 **Figure 6. GELs, E-TELS and R-TELS in rice.**

507 (A) Box plots of CpG methylation levels in 200-bp genomic tiles sorted as TELs and GELs of rice *met1*  
508 relative to wild type.

509 (B) Box plots representing the copy number (blast hits) of 200-bp tiles assigned to R-TELS, E-TELS and  
510 GELs, comparison of Arabidopsis and rice. Each assigned tile was blasted against the corresponding  
511 reference genome and number of blast hits for each category (Blastn expectation value  $< 10$ ) is  
512 reported.

513 (C) Box plots representing the relative proportions of numbers of CpGs for R-TELS, E-TELS and GELs  
514 and their expected frequency in 200-bp tiles of the Arabidopsis and rice genomes.

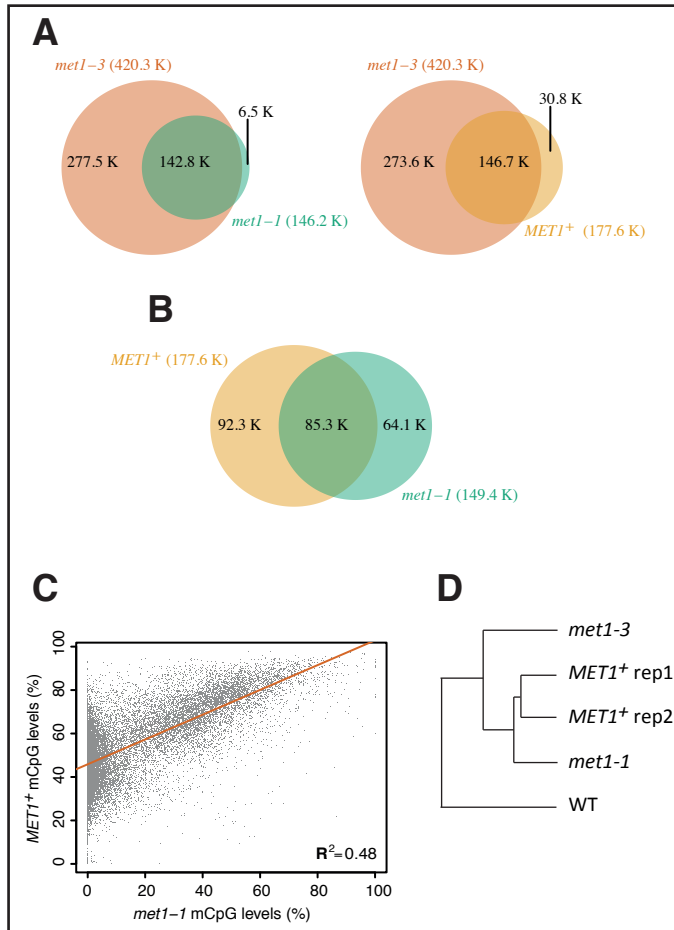

Catoni et al. Figure 2

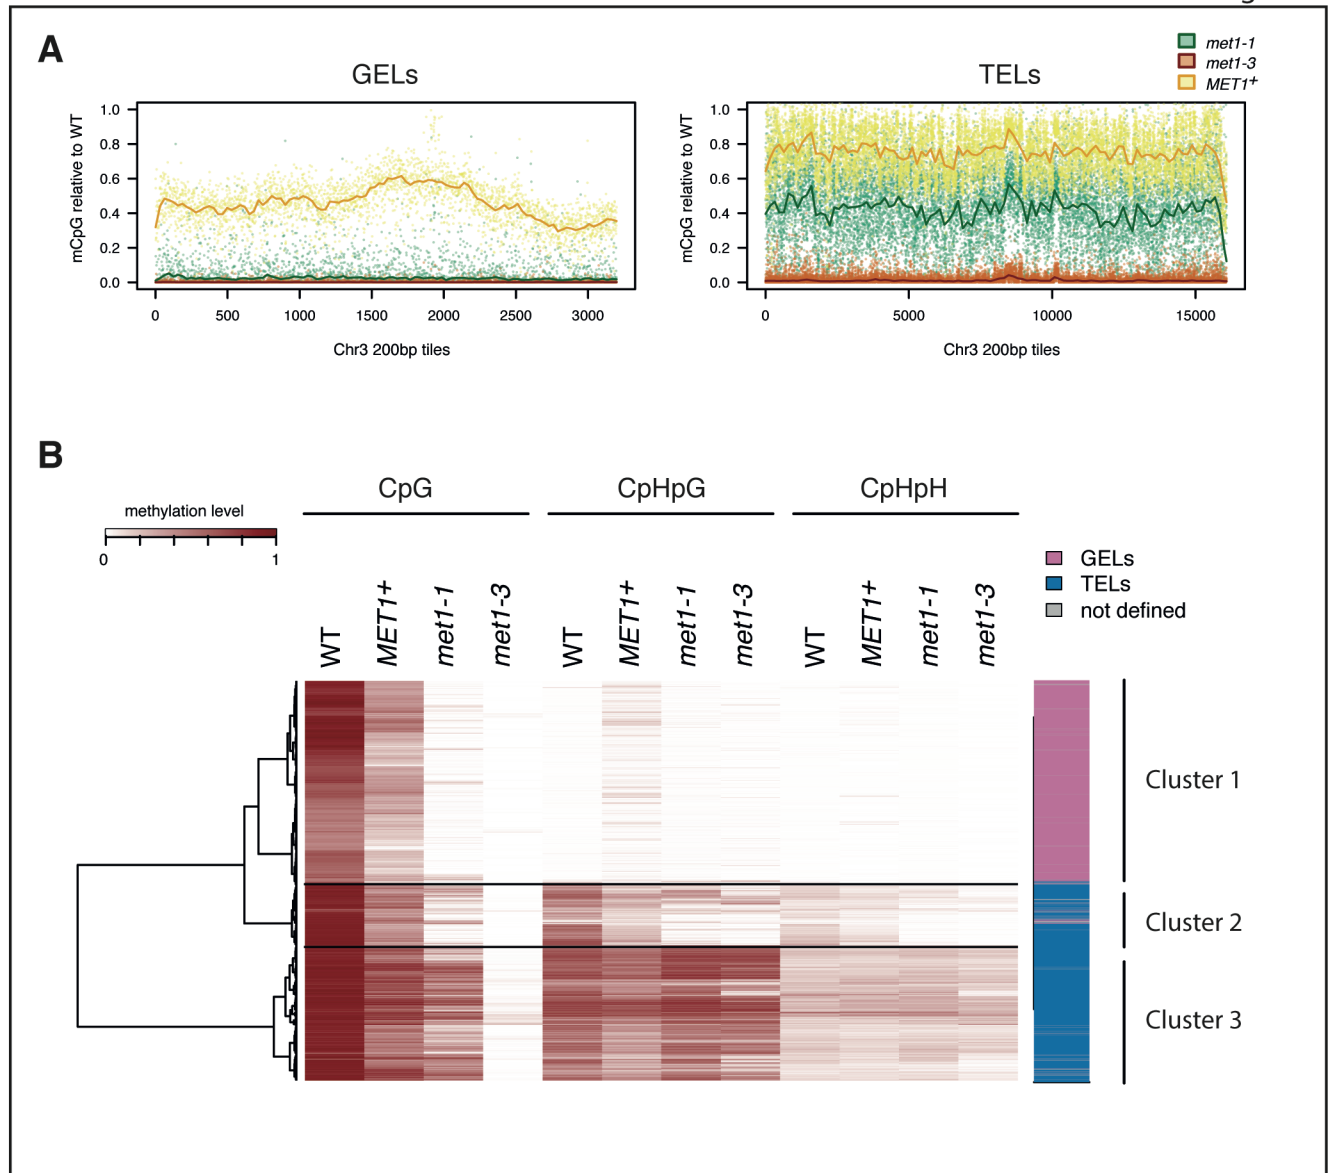



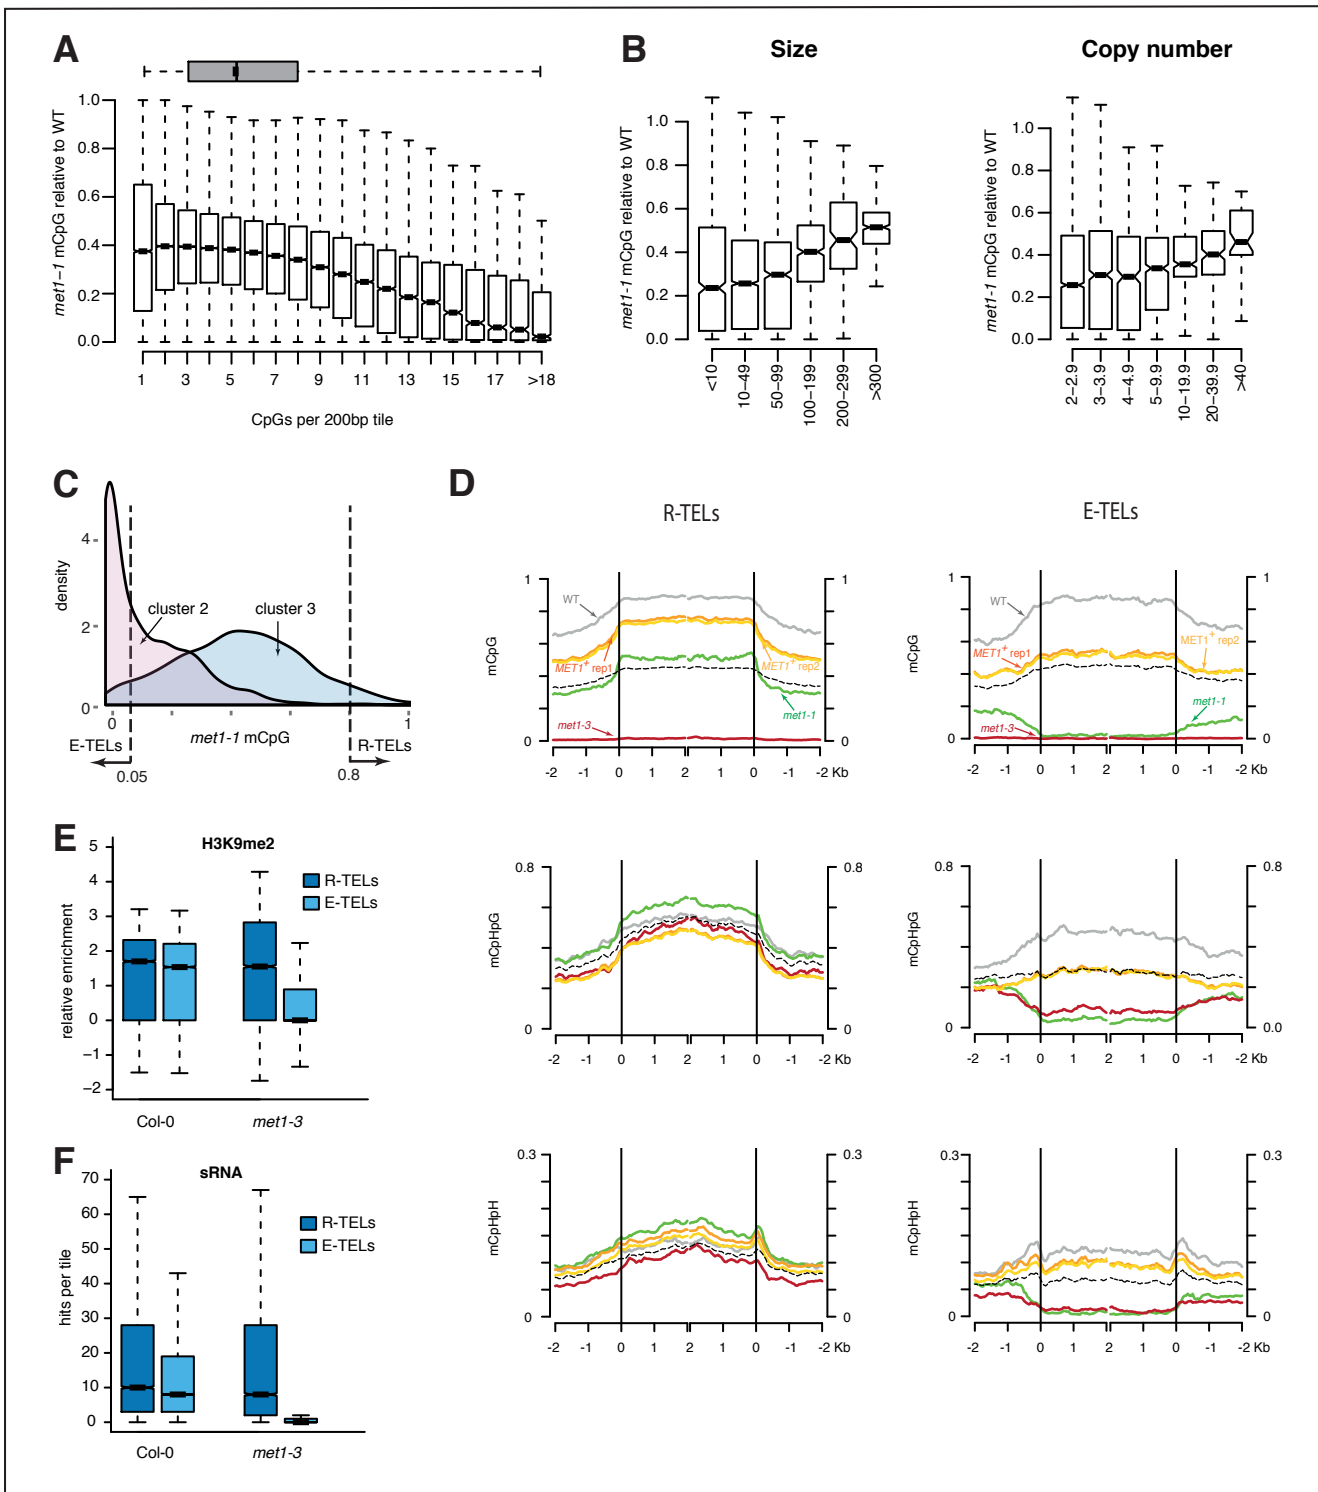

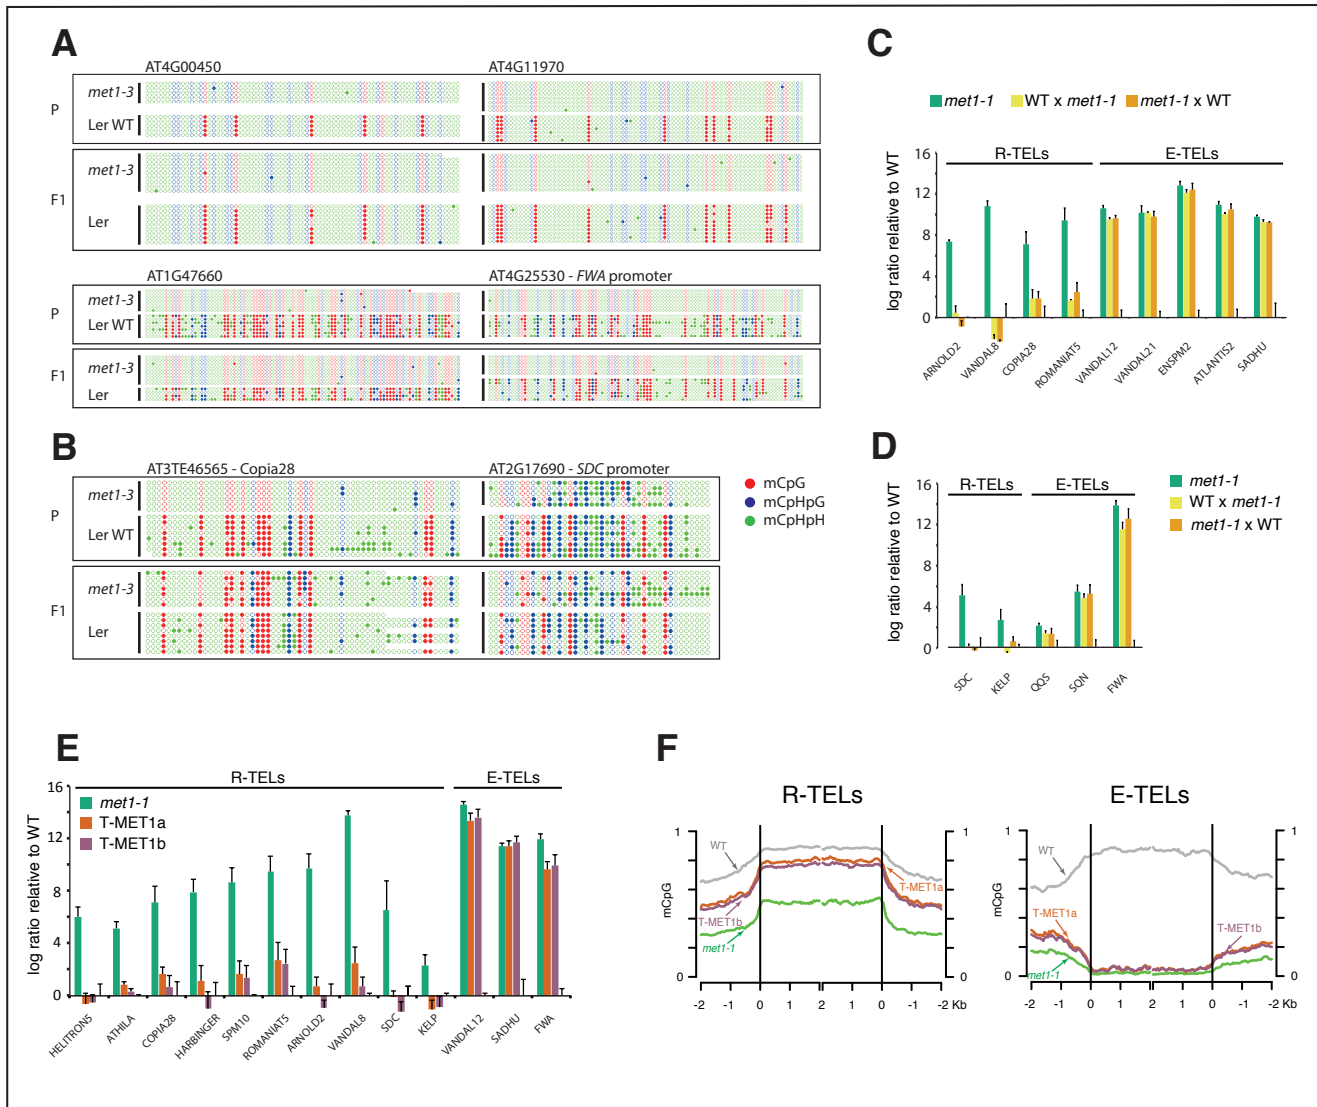

Catani et al. Figure 5

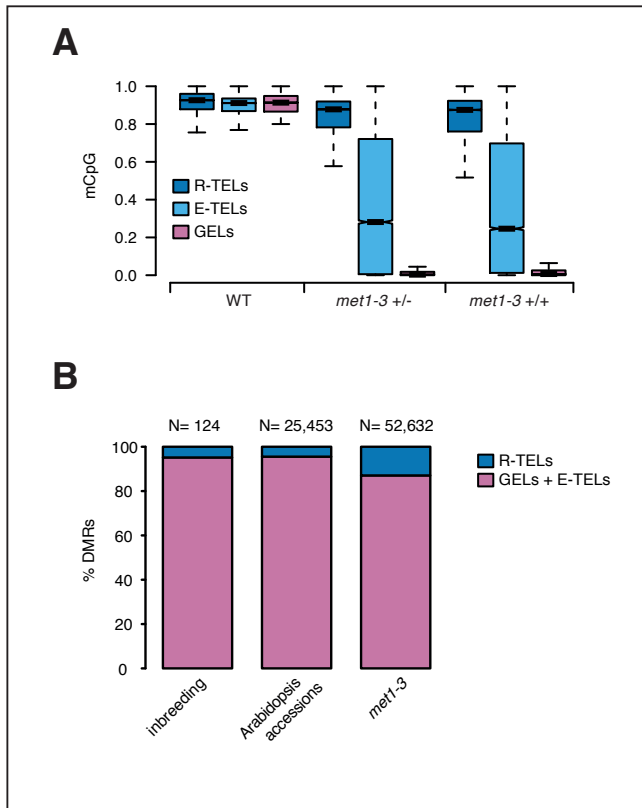

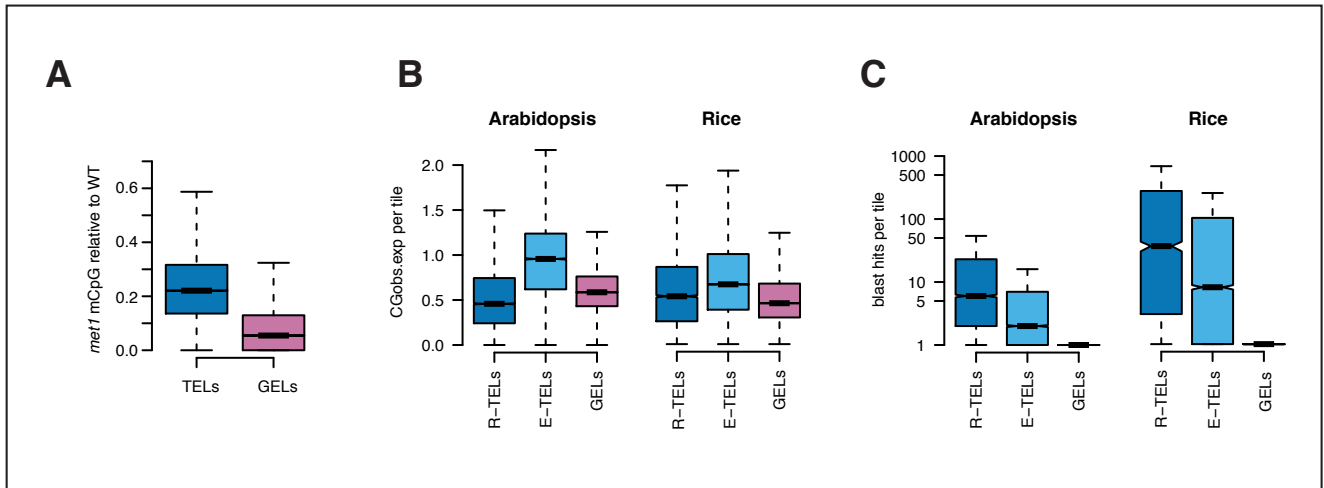

Source: https://www.biorxiv.org/content/biorxiv/early/2016/06/08/057794.full.pdf
